# Supplementary material
Source: PubMed Central journal article supplement (PMC6541477)

179 **Supplementary figure legends**

180

181 **Fig. E1. mRNA and protein expression of mutant IKAROS. (A)** Relative quantification of  
182 *IKZF1* mRNA in B cells from healthy controls (C1-C3) and patients (P1, P2) normalized to the  
183 average of the three housekeeping genes (GAPDH, Actin, HPRT) and relative to C1 (two  
184 repeats in triplicate). **(B)** Representative western blot analysis of IKAROS expression in  
185 whole protein lysates from EBV-transformed B cells from P1, P2, C4 and C5. **(C)**  
186 Quantification of IKAROS protein from western blot in B, normalized to histone H1 (4  
187 technical replicates).

188

189 **Fig. E2 Representative EMSAs using FLAG-tagged expression plasmids. (A)**

190 Representative western blot of nuclear enriched fractions from HEK293T cells transfected  
191 with Flag-tagged plasmids containing 100% WT IKAROS, 100% L188V mutant IKAROS,  
192 WT:L188V IKAROS in a 50:50 ratio or 100% p.173-253del control (two repeats). **(B)** Western  
193 blot of the nuclear extracts in (A) using anti-Flag antibodies as in A but normalized to WT  
194 expression for use in EMSA (two repeats). **(C)** EMSAs were performed using two different  
195 probes: IK-bs4 and YSat8 as indicated. Lanes were loaded with nuclear extracts from  
196 untransfected HEK cells (Untr) or HEK cells transfected with 100% WT, 100% mutant L188V,  
197 WT:L188V in a 50:50 ratio or 100% p.173-253del control. A supershift was induced by adding  
198 anti-Flag antibody. **(D)** Lanes were loaded with nuclear extracts containing the same amount  
199 of WT IKAROS but increasing amount of mutant L188V, supplemented with empty vector  
200 (EV). The arrows mark the size of complexes containing IKAROS.

201

202 **Fig. E3. Representative EMSAs using HA-tagged WT and Flag-tagged L188V**

203 **expression plasmids. (A)** Representative western blot of nuclear enriched fractions from  
204 HEK293T cells transfected with HA-tagged WT driven by SV40 promoter and Flag-tagged  
205 L188V mutant IKAROS driven by CAG promoter (three repeats to achieve normalization to  
206 housekeeping genes). **(B)** Lanes were loaded with nuclear extracts containing the same  
207 amount of HA-tagged WT IKAROS driven by the SV40 promoter and increasing amounts of  
208 Flag-tagged L188V mutant IKAROS driven by the CAG promoter. Relative quantification for  
209 each probe is shown on the far right (five independent experiments for IK-bs4, two for YSat8).

210 The arrows mark the size of complexes containing IKAROS.

211

212 **Fig. E4. Mutant IKAROS feeds a pro-germinal center immunological phenotype.** PBMCs  
 213 were isolated from P1, P2 (together referred to as 'P' for patients), mother, brother and 3  
 214 healthy young adult controls (HC) to stain for a comprehensive B- and T cell panel (samples  
 215 from two different time points denoted by circles or triangles). P1 and P2 are always indicated  
 216 in blue and in red respectively. Error bars denote the standard error of the mean. **(A)** Total B  
 217 cell numbers as a percentage of total lymphocytes for P1 and P2 compared to HC. **(B)** TREC  
 218 and kappa-deleting recombination excision circles values. Pediatric controls (<18 yr) are  
 219 indicated by triangles and adult controls by circles. **(C-G)** B cell subsets of HC and P as a  
 220 percentage of CD19+ cells. **(H)** CD4+ and CD8+ T cells as a percentage of total lymphocytes  
 221 in HC and P. **(I)** CD4/CD8 ratio. **(J-K)** Naïve T cells and CD45RA+ effector memory T cells  
 222 (TEMRA) as a percentage of single positive CD8+ T cells in age-matched HC and P2. **(L-M)**  
 223 Regulatory T cells (Treg) and follicular helper T cells (Tfh) as a percentage of single positive  
 224 CD4+ cells in HC and P. **(N)** Follicular regulatory T cells (Tfr) in HC and P as a percentage of  
 225 CD25+Foxp3+ Treg.

226

227 **Fig. E5. Decreased naïve antigen receptor repertoire diversity in patients with L188V**  
 228 **IKAROS.** **(A)** V gene and **(B)** J gene usage in purified B cells from 10 healthy controls (grey)  
 229 as well as P1 (blue) and P2 (red). **(C)** Junction characteristics of mutant IKAROS patients  
 230 compared to 10 healthy controls (HC). Median number of total deletions, N-nucleotide  
 231 additions and the CDR3 length of IGH rearrangements. **(D)** Diversity index of the naive B cell  
 232 repertoire in mutant IKAROS patients and age-matched HC. **(E)** The subclass distribution of  
 233 IGG and IGA transcripts with 7 age-matched controls for P1 and 6 age-matched controls for  
 234 P2. **(F)** Median percentage of somatic hypermutation (SHM) is shown for P1 and P2 and age-  
 235 matched controls. Mean±SEM. Experiments in (A-F) were performed once.

236

237 **Fig. E6. Proliferative potential of mutant IKAROS B cells using a CFSE assay.** CFSE-  
 238 labeled B cells were negatively selected from P1, P2, mother, brother and 3 healthy controls  
 239 (HC), and stimulated in culture for 5 days with 10µg/ml anti-IgM mix + 1µg/ml anti-CD40L +

240 1µg/ml CpG (two repeats). **(A)** Representative plots gated for percentage of proliferating cells  
241 for both patients and 2 out of 5 controls. **(B)** Percentage of proliferating B cells from HC  
242 versus P. **(C)** Proliferation index of HC versus P. **(D)** PBMCs stimulated with anti-IgM-IgA-IgG  
243 10µg/ml or anti-IgM-IgA-IgG 10µg/ml + CD40L 1µg/ml for 24hrs were stained for Ki67.  
244 Percentage of Ki67+ cells in the CD19+ population (two repeats).

245

246 **Fig. E7. Hyperresponsive patient EBV transformed B cells. (A)** Total Erk1/2 MFI on EBV  
247 transformed B cells from P2 and unrelated HC (one repeat). **(B)** EBV transformed B cells  
248 stimulated with 10µg/ml anti-IgM-IgA-IgG were stained for pErk. Shaded area marks one  
249 standard deviation above and below the mean of the HC (Representative of two repeats). **(C)**  
250 Baseline MFI of pErk on EBV transformed B cells from P2 and unrelated HC normalized to  
251 average of HC (two repeats).

252

253 **Fig. E8. IKAROS binding to the CD22 locus. (A)** Signal tracks of IKAROS ChIP-seq data  
254 from human GM12878 B-lymphocytes and human pre-B ALL. Location of the CD22 EMSA  
255 probes are indicated. **(B)** Representative CD22 EMSAs performed using two different probes:  
256 CD22.1 and CD22.2 as indicated. Lanes were loaded with nuclear extracts from  
257 untransfected HEK cells (Untr) or HEK cells transfected with 100% WT, 100% mutant L188V,  
258 WT:L188V in a 50:50 ratio or 100% p.173-253del control. The arrows mark the size of  
259 complexes containing IKAROS. A supershift was induced by adding anti-Flag antibody (three  
260 repeats). **(C)** ChIP-qPCR using IgG input from EBV transformed B cells of P2, HC and  
261 GM12878 human B lymphocytes (three repeats).

262

263

264

265 **Supplementary tables**266 **Table E1.** Laboratory values of P1 and of P2 at age 12 years

| Parameter                                         | P1 (Age 49y)                              | P2 (Age 12y)                             |                                          |
|---------------------------------------------------|-------------------------------------------|------------------------------------------|------------------------------------------|
|                                                   |                                           | Before treatment                         | After treatment*                         |
| Lymphocytes (count/ $\mu$ L)                      | 2300 (1200-3600)                          | 2000 (1500-2000)                         | 1600 (1000-5300)                         |
| CD19 <sup>+</sup> (% of total lymphocytes)        | 16.8 (5.0 -20.0)                          | 6.9 (8.0-24.0)                           | 5.0 (8.0-24.0)                           |
| CD19 <sup>+</sup> (count/ $\mu$ L of lymphocytes) | 381 (82-476)                              | 138 (200-600)                            | 81 (200-600)                             |
| CD3 <sup>+</sup> (% of total lymphocytes)         | 70.0 (58.0-84.0)                          | 86.6 (52.0-78.0)                         | 82.7 (52.0-78.0)                         |
| CD3 <sup>+</sup> (count/ $\mu$ L of lymphocytes)  | 1594 (798-2823)                           | 1733 (800-3500)                          | 1340 (800-3500)                          |
| Lupus anticoagulant Ab                            | Positive                                  | Very strongly positive                   | Very strongly positive                   |
| Anticardiolipin Ab (GPL/ml)                       | 4 ( $\leq$ 20)                            | NA                                       | NA                                       |
| Anticardiolipin IgG                               | NA                                        | 9.4 ( $\leq$ 2.5)                        | 4.8 ( $\leq$ 2.5)                        |
| Anticardiolipin IgM                               | NA                                        | 6.4 ( $\leq$ 3.5)                        | 2.1 ( $\leq$ 3.5)                        |
|                                                   | NA                                        | Negative                                 | Negative                                 |
| ANA**                                             | Positive: nuclear,<br>fine speckled 1/160 | Positive: nuclear,<br>homogeneous 1/1280 | Positive: nuclear,<br>homogeneous 1/1280 |
| Anti-dsDNA Ab by Farr (IU/ml)                     | $\leq$ 7                                  | 40.5                                     | 23.5                                     |
| IgG (g/L)                                         | 8.85 (7.51-15.60)                         | 9.38 (5.76-12.65)                        | 2.94 (5.76-12.65)                        |
| IgA (g/L)                                         | 1.12 (0.82-4.53)                          | 0.60 (0.81-2.32)                         | 0.17 (0.81-2.32)                         |
| IgM (g/L)                                         | 0.42 (0.46-3.04)                          | 0.90 (0.30-1.59)                         | 0.69 (0.30-1.59)                         |
| Antibody response                                 |                                           |                                          |                                          |
| Pneumococcal polysaccharide                       | /                                         | Normal                                   | /                                        |
| Hepatitis B surface Ab (mIU/ml)                   | /                                         | 0.0 ( $\geq$ 10.0)                       | /                                        |
| Mumps IgG                                         | /                                         | Negative                                 | /                                        |
| Measles IgG (mIU/ml)                              | /                                         | 430 ( $\geq$ 10.0)                       | /                                        |
| Rubellavirus IgG (IU/ml)                          | /                                         | 6.3 ( $\geq$ 10.0)                       | /                                        |

267 \* Current treatment four months after initiation comprised of 4mg corticosteroids, hydroxychloroquine, oral  
 268 anticoagulation and prophylactic amoxicilline.

269 \*\* Other autoantibodies tested in P2 were negative: Ro60, SSB/La, U1-RNP, RNP-70, Sm, Scl-70 sensitive, Jo-1,  
 270 Ro52

271 ANA = anti-nuclear antibodies, Ab = antibodies, anti-dsdDNA = anti-double stranded DNA, IgG/IgA/IgM =  
 272 immunoglobulin G/A/M  
 273

274 **Supplementary references**

- 275 1. Van Eyck L, De Somer L, Pombal D, Bornschein S, Frans G, Humblet-Baron S, et al.  
276 Brief report: IFIH1 mutation causes systemic lupus erythematosus with selective IgA  
277 deficiency. *Arthritis Rheumatol.* 2015;67(6):1592-1597.
- 278 2. Kircher M, Witten DM, Jain P, O’Roak BJ, Cooper GM, Shendure J. A general  
279 framework for estimating the relative pathogenicity of human genetic variants. *Nat*  
280 *Publ Gr.* 2014;46(3):310-315.
- 281 3. Itan Y, Shang L, Boisson B, Patin E, Bolze A, Moncada-Vélez et al. The human gene  
282 damage index as a gene-level approach to prioritizing exome variants. *Proc Natl Acad*  
283 *Sci U S A.* 2015;112(44):13615-13620.
- 284 4. Neitzel H. A routine method for the establishment of permanent growing  
285 lymphoblastoid cell lines. *Hum Genet.* 1986;Aug(73(4)):320-326.
- 286 5. Molnár A, Georgopoulos K. The Ikaros gene encodes a family of functionally diverse  
287 zinc finger DNA-binding proteins. *Mol Cell Biol.* 1994;14(12):8292-8303.
- 288 6. Sun L, Liu A, Georgopoulos K. Zinc finger-mediated protein interactions modulate  
289 Ikaros activity, a molecular control of lymphocyte development. *EMBO J.*  
290 1996;15(19):5358-5369.
- 291 7. van der Burg M, Kreyenberg H, Willasch A, Barendregt BH, Preuner S, Watzinger F,  
292 et al. Standardization of DNA isolation from low cell numbers for chimerism analysis  
293 by PCR of short tandem repeats. *Leuk Off J Leuk Soc Am Leuk Res Fund, UK.*  
294 2011;25(9):1467-1470.
- 295 8. Driessen GJ, Ijspeert H, Weemaes CMR, Haraldsson Á, Trip M, Warris A, et al.  
296 Antibody deficiency in patients with ataxia telangiectasia is caused by disturbed B-  
297 and T-cell homeostasis and reduced immune repertoire diversity. *J Allergy Clin*  
298 *Immunol.* 2013;131(5).
- 299 9. Ijspeert H, Wentink M, van Zessen D, Driessen GJ, Dalm VA, van Hagen, MP, et al.  
300 Strategies for B-cell receptor repertoire analysis in primary immunodeficiencies: from  
301 severe combined immunodeficiency to common variable immunodeficiency. *Front*  
302 *Immunol.* 2015;6(April):157.
- 303 10. van Dongen JJ, Langerak AW, Brüggemann M, Evans PA, Hummel M, Lavender FL,

- 304 et al. Design and standardization of PCR primers and protocols for detection of clonal  
305 immunoglobulin and T-cell receptor gene recombinations in suspect  
306 lymphoproliferations: report of the BIOMED-2 Concerted Action BMH4-CT98-3936.  
307 *Leukemia*. 2003;17(October):2257-2317.
- 308 11. Moorhouse MJ, van Zessen D, IJspeert H, Hiltemann S, Horsman S, van der Spek PJ,  
309 et al. ImmunoGlobulin galaxy (IGGalaxy) for simple determination and quantitation of  
310 immunoglobulin heavy chain rearrangements from NGS. *BMC Immunol*.  
311 2014;15(1):59.
- 312 12. IJspeert H, van Schouwenburg PA, van Zessen D, Pico-Knijnenburg I, Stubbs AP, van  
313 der Burg M. Antigen Receptor Galaxy: A User-Friendly, Web-Based Tool for Analysis  
314 and Visualization of T and B Cell Receptor Repertoire Data. *J Immunol*. 2017.
- 315 13. Alamyar E, Duroux P, Lefranc MP, Giudicelli V. IMGT(®) tools for the nucleotide  
316 analysis of immunoglobulin (IG) and T cell receptor (TR) V-(D)-J repertoires,  
317 polymorphisms, and IG mutations: IMGT/V-QUEST and IMGT/HighV-QUEST for  
318 NGS. *Methods Mol Biol*. 2012;(882):569-604.
- 319 14. IJspeert H, van Schouwenburg PA, van Zessen D, Pico-Knijnenburg I, Driessen GJ,  
320 Stubbs AP, et al. Evaluation of the Antigen-Experienced B-Cell Receptor Repertoire in  
321 Healthy Children and Adults. *Front Immunol*. 2016;7(October):410.
- 322 15. Tiller T, Meffre E, Yurasov S, Tsuiji M, Nussenzweig MC, Wardemann H. Efficient  
323 generation of monoclonal antibodies from single human B cells by single cell RT-PCR  
324 and expression vector cloning. *J Immunol Methods*. 2008;329(1-2):112-124.
- 325 16. Berkowska MA, Schickel JN, Grosserichter-Wagener C, de Ridder D, Ng YS, van  
326 Dongen JJ, et al. Circulating Human CD27-IgA+ Memory B Cells Recognize Bacteria  
327 with Polyreactive Igs. *J Immunol*. 2015;195(4):1417-1426.
- 328 17. Schjerven H, Ayongaba EF, Aghajani-refah A, McLaughlin J, Cheng D, Geng H, et al.  
329 Genetic analysis of Ikaros target genes and tumor suppressor function in BCR-ABL1+  
330 pre-B ALL. 2017:1-22.
- 331 18. Levy C, Fusil F, Amirache F, Costa C, Negre D. Baboon envelope pseudotyped  
332 lentiviral vectors efficiently transduce human B cells and allow active factor IX B cell  
333 secretion in vivo in NOD/SCID $\gamma$ <sup>-/-</sup> mice. 2016:2478-2492.

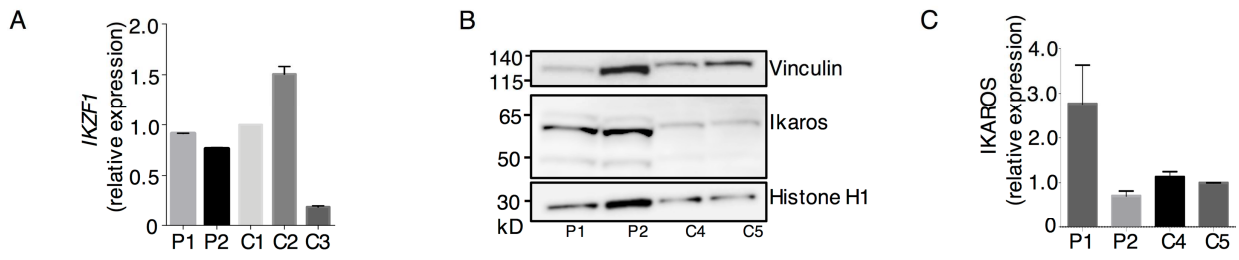

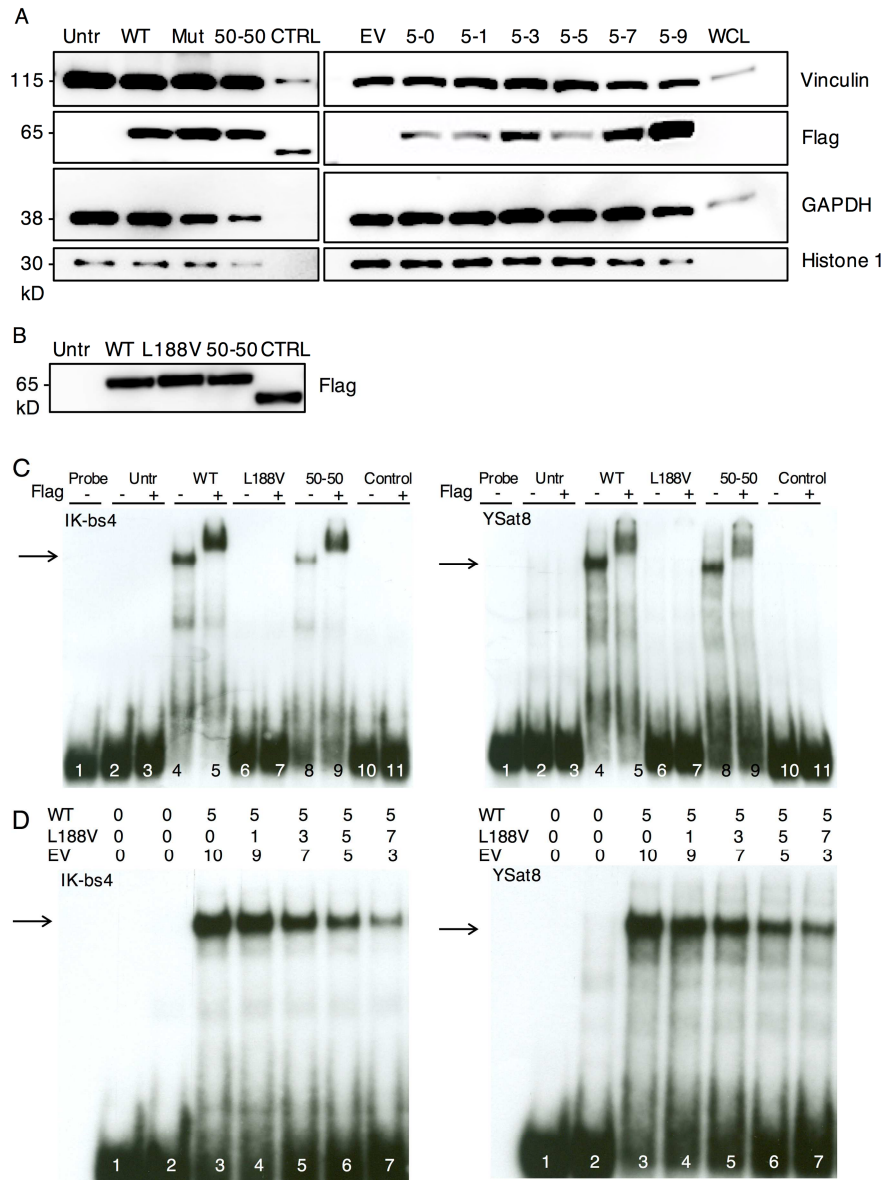



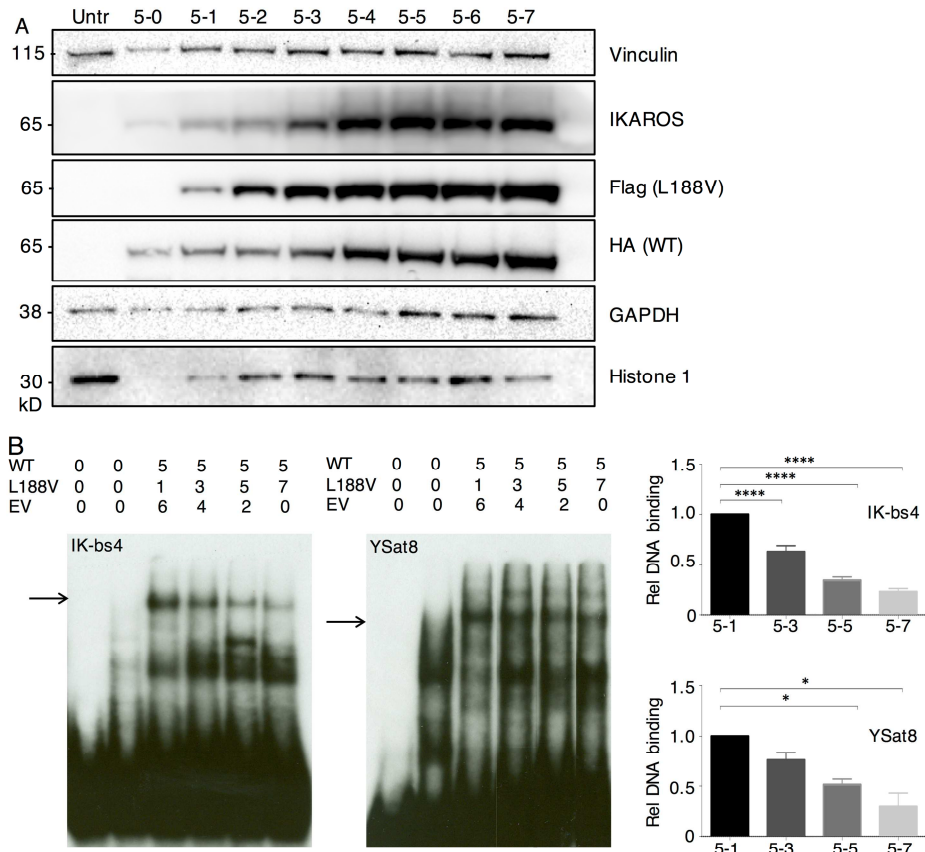

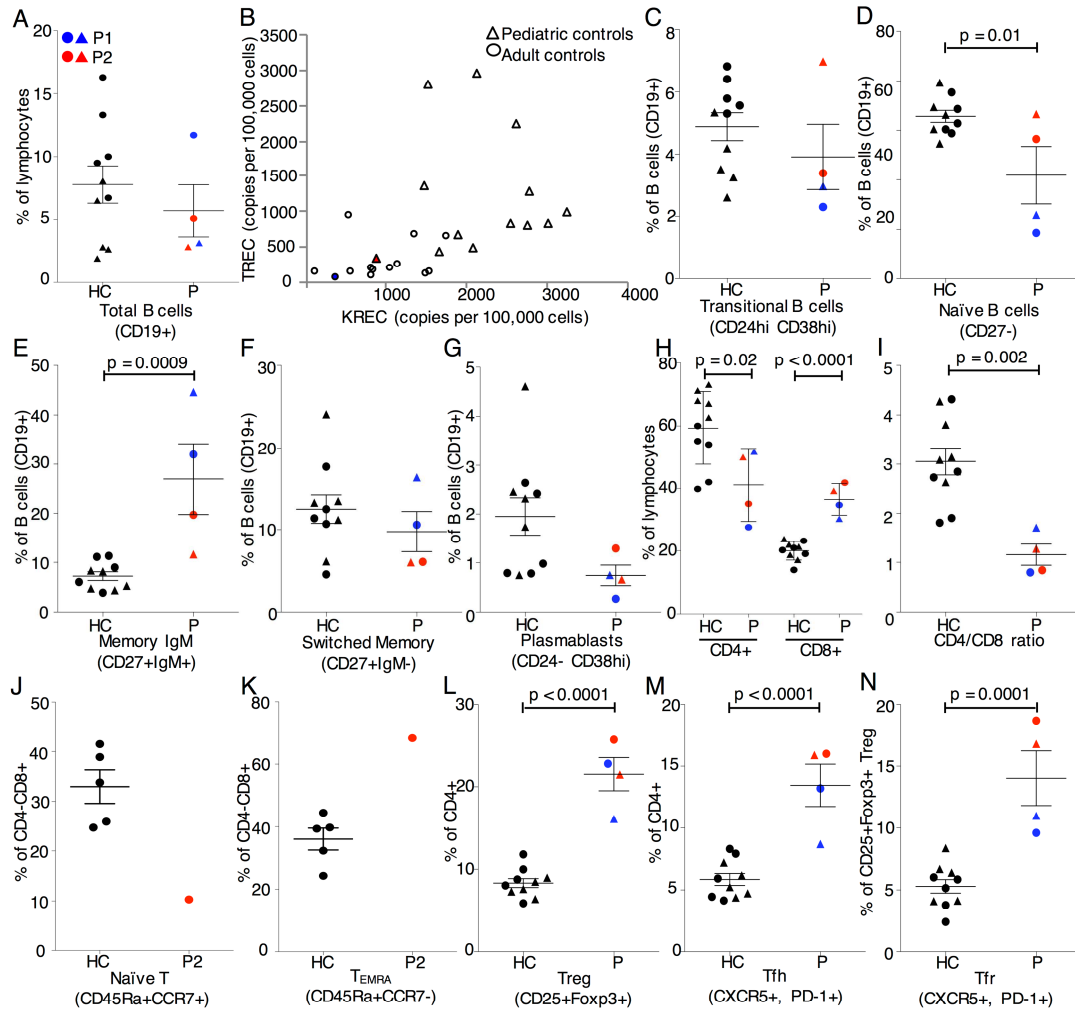

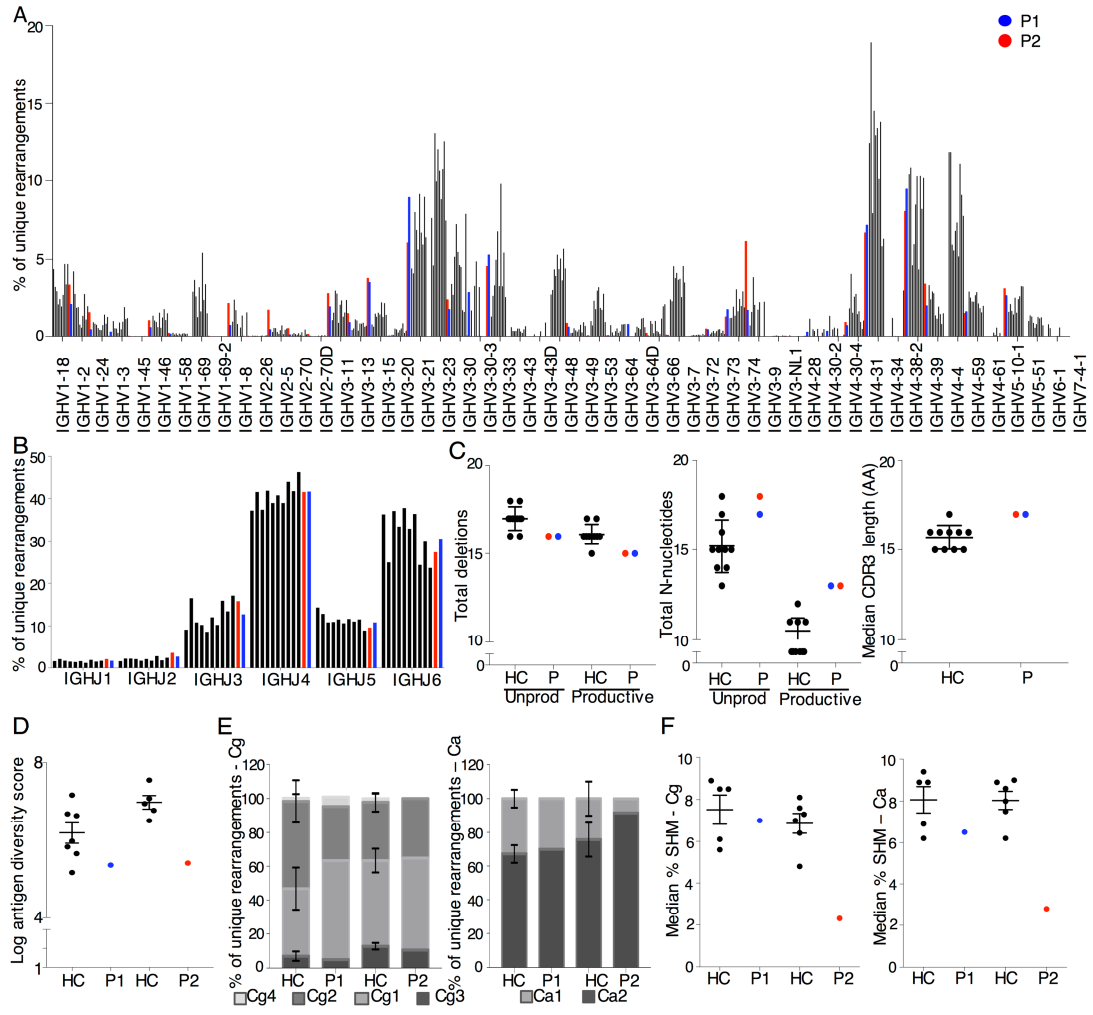

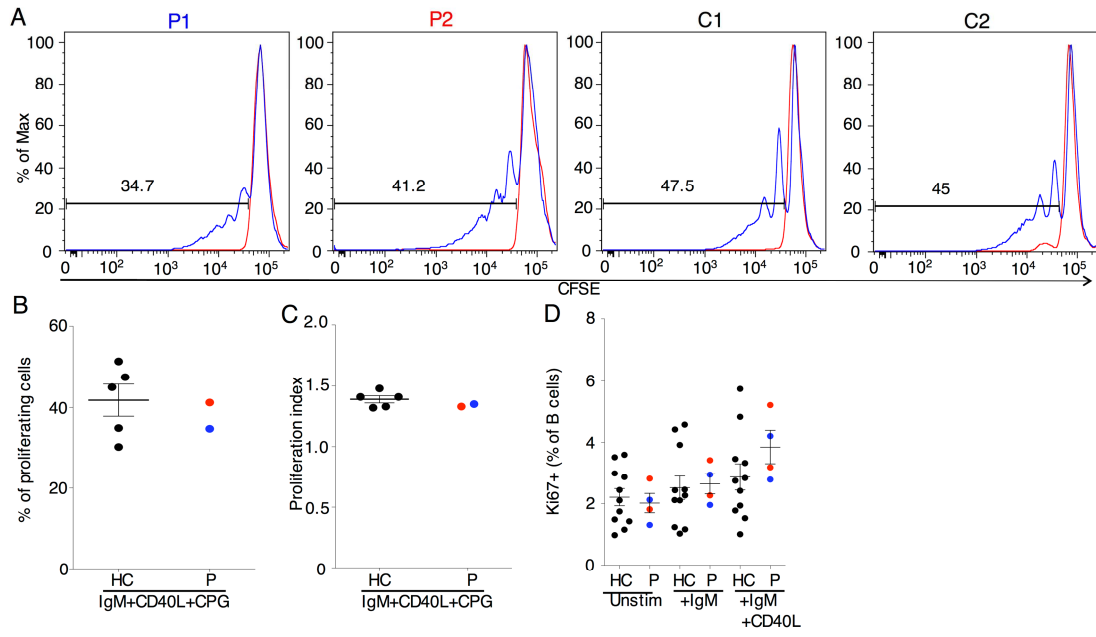

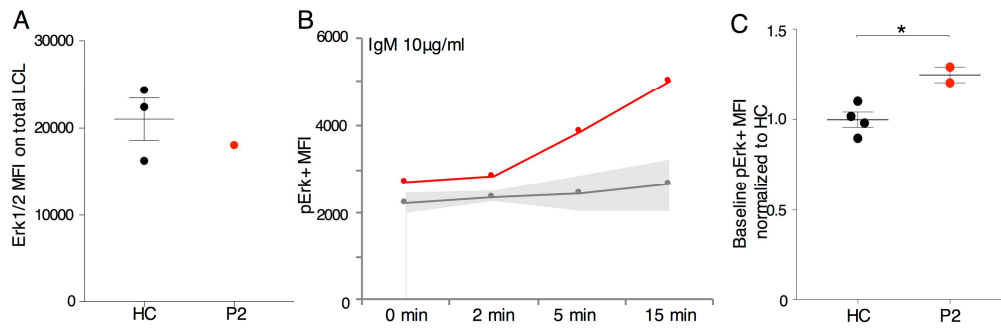

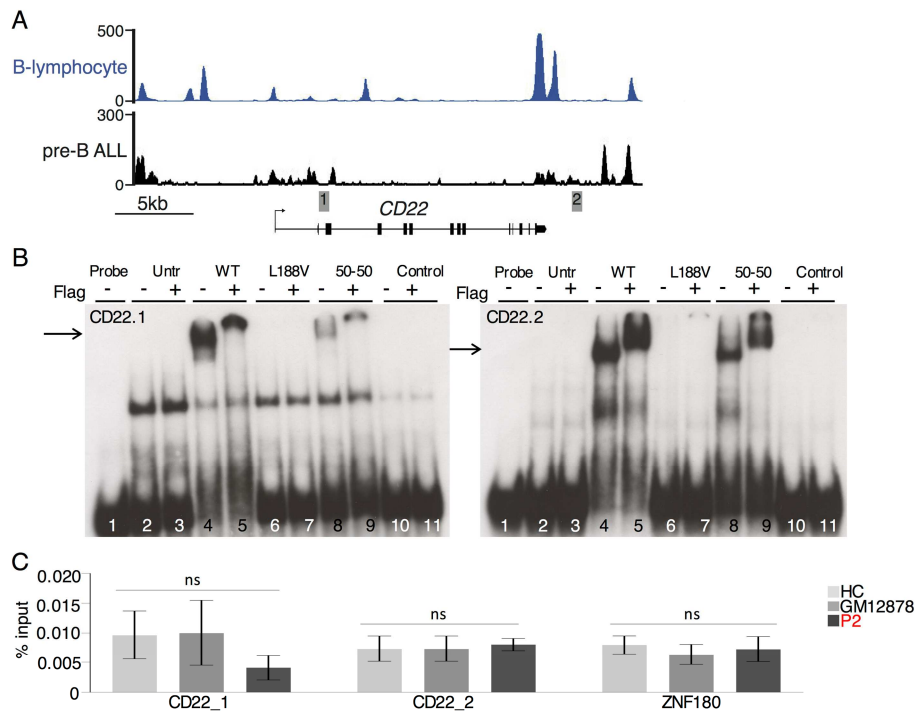

Supplement: NIHMS1023932-supplement-1.pdf [file NIHMS1023932-supplement-1.pdf]
